# Supplementary material for: Recycling and Extraction of Zinc Ions in Disc-Donut Column Considering Forward Mixing Mass Transfer, Chemical Reaction and Effects of Pulsed and non-Pulsed Condition
Source: Research Square preprint supplement (doi:10.21203/rs.3.rs-765621/v1), 2021-08-05
Supplement: Supplementary file 1 [file af61085171ceb9bf120138eb.docx]

**Table 1.** Mass balance equations for four models

| **Model** | **Governing Equations** | **Remarks** |
| --- | --- | --- |
| PFM |  | Continuous phase mass balance |
|  |  | Dispersed phase mass balance |
|  |  | Boundary Conditions at top of column (z=0) |
|  |  | Boundary Conditions at bottem of column (z=H) |
| BFM |  | Continuous phase mass balance |
|  | Dispersed phase mass balance |
|  | Boundary Conditions at top of column (z=0) |
|  | Boundary Conditions at bottem of column (z=H) |
| ADM |  | Continuous phase mass balance |
|  | Dispersed phase mass balance |
|  | Boundary Conditions at top of column (z=0) |
|  | Boundary Conditions at bottem of column (z=H) |
| FMM |  | Continuous phase mass balance |
|  | Dispersed phase mass balance |
|  | Boundary Conditions at top of column (z=0) |
|  | Boundary Conditions at bottem of column (z=H) |
|  | Dynamic drop size distribution |
|  | Drop velocity |
|  |  |
|  | Volumetric drop size distribution |
|  | Drop specific surface area |
|  | Drop holdup |
